# Supplementary material for: Seven new species of Night Frogs (Anura, Nyctibatrachidae) from the Western Ghats Biodiversity Hotspot of India, with remarkably high diversity of diminutive forms
Source: PubMed Central journal article supplement (PMC5322763; doi:10.7717/peerj.3007), 2017-02-21
Supplement: peerj-05-3007-s003.pdf [file peerj-05-3007-s003.pdf]

Supplemental information: **Tables**

**Seven new species of Night Frogs (Anura, Nyctibatrachidae) from the Western Ghats Biodiversity Hotspot of India, with remarkably high diversity of diminutive forms**

Sonali Garg, Robin Suyesh, Sandeep Sukesan and S D Biju

**Table S1. List of DNA sequences used in the study.**

| Species                     | Collection locality                      | Voucher number   | Accession number | Reference                       |
|-----------------------------|------------------------------------------|------------------|------------------|---------------------------------|
| <i>N. acanthodermis</i>     | Nelliyampathi, Kerala                    | SDB 23           | JN644915         | Van Bocxlaer <i>et al.</i> 2012 |
| <i>N. aliciae</i>           | Ponmudi, Kerala                          | SDB 1142         | JN644893         | Van Bocxlaer <i>et al.</i> 2012 |
| <i>N. anamallaiensis</i>    | Valparai, Tamil Nadu                     | SDB 40321        | JN644899         | Van Bocxlaer <i>et al.</i> 2012 |
| <i>N. athirappillyensis</i> | Thavalakuzhipara, Vazhachal, Kerala      | ZSI/WGRC/V/A/891 | KY447300         | Present study                   |
| <i>N. beddomii</i>          | Ponmudi, Kerala                          | SDB (DEL) 1479   | JN644913         | Van Bocxlaer <i>et al.</i> 2012 |
| <i>N. danieli</i>           | Koyna, Maharashtra                       | SDB (Varad) E2   | JN644902         | Van Bocxlaer <i>et al.</i> 2012 |
| <i>N. dattatreyaensis</i>   | Chikmalagur-Kemmangudi road, Karnataka   | SDB (DEL) 0267   | JN644891         | Van Bocxlaer <i>et al.</i> 2012 |
| <i>N. deccanensis</i>       | Eravikulam, Kerala                       | SDB 1056         | JN644911         | Van Bocxlaer <i>et al.</i> 2012 |
| <i>N. deveni</i>            | Nelliyampathi, Kerala                    | SDB 25           | JN644895         | Van Bocxlaer <i>et al.</i> 2012 |
| <i>N. gavi</i>              | Gavi, Kerala                             | SDB 4836         | JN644918         | Van Bocxlaer <i>et al.</i> 2012 |
| <i>N. grandis</i>           | Thirunelli, Kerala                       | SDB 40360        | JN644904         | Van Bocxlaer <i>et al.</i> 2012 |
| <i>N. humayuni</i>          | Koyna, Maharashtra                       | SDB (Varad) 8    | JN644901         | Van Bocxlaer <i>et al.</i> 2012 |
| <i>N. indraneili</i>        | Longwood shola, Tamil Nadu               | SDB 4017         | JN644909         | Van Bocxlaer <i>et al.</i> 2012 |
| <i>N. jog</i>               | Jog Falls, Karnataka                     | SDB 40144        | JN644900         | Van Bocxlaer <i>et al.</i> 2012 |
| <i>N. karnatakaensis</i>    | Kudremukh, Karnataka                     | SDB 1098         | JN644910         | Van Bocxlaer <i>et al.</i> 2012 |
| <i>N. kempholeyensis</i>    | Kempholay, Karnataka                     | SDBDU 2012.53    | KY447307         | Present study                   |
| <i>N. kumbara</i>           | –                                        | Isolate A1       | KF935242         | Gururaja <i>et al.</i> 2014     |
| <i>N. major</i>             | India                                    | –                | AF249052         | Bossuyt & Milinkovitch 2000     |
| <i>N. manalari</i>          | Upper Manalar, Periyar TR, Kerala        | SDBDU 2015.2994  | KY447301         | Present study                   |
| <i>N. minimus</i>           | Kalpetta, Kerala                         | SDB 33           | JN644896         | Van Bocxlaer <i>et al.</i> 2012 |
| <i>N. minor</i>             | Ponmudi, Kerala                          | SDB 1146         | JN644908         | Van Bocxlaer <i>et al.</i> 2012 |
| <i>N. periyar</i>           | Vallakadavu check post, Thekkady, Kerala | SDB 4813         | JN644897         | Van Bocxlaer <i>et al.</i> 2012 |
| <i>N. petraeus</i>          | Amboli, Maharashtra                      | SDB 2004-023     | JN644912         | Van Bocxlaer <i>et al.</i> 2012 |
| <i>N. pillaii</i>           | Sengalthery, Tamil Nadu                  | SDB 40286        | JN644892         | Van Bocxlaer <i>et al.</i> 2012 |
| <i>N. poocha</i>            | Valparai, Tamil Nadu                     | SDB 1175         | JN644907         | Van Bocxlaer <i>et al.</i> 2012 |
| <i>N. pulivijayani</i>      | Pandipath, Agasthyamala, Kerala          | ZSI/WGRC/V/A/906 | KY447302         | Present study                   |

|                               |                                        |                  |          |                                 |
|-------------------------------|----------------------------------------|------------------|----------|---------------------------------|
| <i>N. radcliffei</i>          | Thiashola estate, Nilgiris, Tamil Nadu | SDBDU 2014.2771  | KY447303 | Present study                   |
| <i>N. robinmoorei</i>         | Kakkachi, Tamil Nadu                   | ZSI/WGRC/V/A/925 | KY447304 | Present study                   |
| <i>N. sabarimalai</i>         | Pamba, Kerala                          | ZSI/WGRC/V/A/932 | KY447305 | Present study                   |
| <i>N. sanctipalustris</i>     | Thalakkaveri, Karnataka                | SDB 6012         | JN644917 | Van Bocxlaer <i>et al.</i> 2012 |
| <i>N. shiradi</i>             | Sakleshpur-Gundia road, Karnataka      | SDB (DEL) 0233   | JN644898 | Van Bocxlaer <i>et al.</i> 2012 |
| <i>N. sylvaticus</i>          | Sakleshpur, Karnataka                  | SDB 4672         | JN644916 | Van Bocxlaer <i>et al.</i> 2012 |
| <i>N. vasanthi</i>            | Kakkachi, Tamil Nadu                   | SDB 2044         | JN644894 | Van Bocxlaer <i>et al.</i> 2012 |
| <i>N. vrijeuni</i>            | Wayanad, Kerala                        | SDB 3028         | JN644905 | Van Bocxlaer <i>et al.</i> 2012 |
| <i>N. webilla</i>             | Kadalar, Kerala                        | ZSI/WGRC/V/A/935 | KY447306 | Present study                   |
| <i>Lankanectes corrugatus</i> | Sri Lanka                              | VUB 0106         | AY948730 | Roelants <i>et al.</i> 2007     |
