# Supplementary material for: Seven new species of Night Frogs (Anura, Nyctibatrachidae) from the Western Ghats Biodiversity Hotspot of India, with remarkably high diversity of diminutive forms
Source: PubMed Central journal article supplement (PMC5322763; doi:10.7717/peerj.3007), 2017-02-21
Supplement: peerj-05-3007-s004.pdf [file peerj-05-3007-s004.pdf]

Supplemental information: **Tables**

**Seven new species of Night Frogs (Anura, Nyctibatrachidae) from the Western Ghats Biodiversity Hotspot of India, with remarkably high diversity of diminutive forms**

Sonali Garg, Robin Suyesh, Sandeep Sukesan and S D Biju

**Table S2. Uncorrected pairwise distances between 16S mitochondrial gene sequences of the new and phylogenetically related *Nyctibatrachus* species.**

| Species                     |                          | Genetic distance |
|-----------------------------|--------------------------|------------------|
| <i>N. athirappillyensis</i> | <i>N. kempholeyensis</i> | 3.2 %            |
| <i>N. manalari</i>          | <i>N. anamallaiensis</i> | 4.1 %            |
| <i>N. manalari</i>          | <i>N. beddomii</i>       | 6.4 %            |
| <i>N. manalari</i>          | <i>N. pulivijayani</i>   | 4.7 %            |
| <i>N. manalari</i>          | <i>N. robinmoorei</i>    | 4.1 %            |
| <i>N. manalari</i>          | <i>N. sabarimalai</i>    | 5.1 %            |
| <i>N. pulivijayani</i>      | <i>N. anamallaiensis</i> | 3.4 %            |
| <i>N. pulivijayani</i>      | <i>N. beddomii</i>       | 7.4 %            |
| <i>N. pulivijayani</i>      | <i>N. robinmoorei</i>    | 6.0 %            |
| <i>N. pulivijayani</i>      | <i>N. sabarimalai</i>    | 3.4 %            |
| <i>N. robinmoorei</i>       | <i>N. anamallaiensis</i> | 6.6 %            |
| <i>N. robinmoorei</i>       | <i>N. beddomii</i>       | 7.2 %            |
| <i>N. robinmoorei</i>       | <i>N. sabarimalai</i>    | 5.5 %            |
| <i>N. sabarimalai</i>       | <i>N. anamallaiensis</i> | 3.4 %            |
| <i>N. sabarimalai</i>       | <i>N. beddomii</i>       | 7.2 %            |
| <i>N. radcliffei</i>        | <i>N. acanthodermis</i>  | 4.1 %            |
| <i>N. radcliffei</i>        | <i>N. gavi</i>           | 3.9 %            |
| <i>N. radcliffei</i>        | <i>N. grandis</i>        | 4.9 %            |
| <i>N. radcliffei</i>        | <i>N. indraneili</i>     | 6.4 %            |
| <i>N. radcliffei</i>        | <i>N. major</i>          | 5.6 %            |
| <i>N. radcliffei</i>        | <i>N. sylvaticus</i>     | 4.5 %            |
| <i>N. webilla</i>           | <i>N. deccanensis</i>    | 3.0 %            |
| <i>N. webilla</i>           | <i>N. minor</i>          | 5.3 %            |
