# Supplementary material for: Seven new species of Night Frogs (Anura, Nyctibatrachidae) from the Western Ghats Biodiversity Hotspot of India, with remarkably high diversity of diminutive forms
Source: PubMed Central journal article supplement (PMC5322763; doi:10.7717/peerj.3007), 2017-02-21
Supplement: peerj-05-3007-s006.pdf [file peerj-05-3007-s006.pdf]

Supplemental information: **Tables**

**Seven new species of Night Frogs (Anura, Nyctibatrachidae) from the Western Ghats Biodiversity Hotspot of India, with remarkably high diversity of diminutive forms**

Sonali Garg, Robin Suyesh, Sandeep Sukesan and S D Biju

**Table S4. Scores for Discriminant function analysis of principal components resulting from nine size-corrected morphometric variables of adult male specimens. Values in bold indicate variables with the highest loadings for discriminant function roots of eigenvalue >1.0.**

| <b>A</b> Discriminant function analysis for <i>Nyctibatrachus anamallaiensis</i> , <i>N. beddomii</i> , <i>N. manalari</i> sp. nov., <i>N. minimus</i> , <i>N. pulivijayani</i> sp. nov., <i>N. robinmoorei</i> sp. nov. and <i>N. sabarimalai</i> sp. nov.                                              |                  |                  |                  |                  |                 |            |
|----------------------------------------------------------------------------------------------------------------------------------------------------------------------------------------------------------------------------------------------------------------------------------------------------------|------------------|------------------|------------------|------------------|-----------------|------------|
| Variable                                                                                                                                                                                                                                                                                                 | DFA root 1       | DFA root 2       | DFA root 3       | DFA root 4       | DFA root 5      | DFA root 6 |
| PC 1                                                                                                                                                                                                                                                                                                     | <b>-0.352661</b> | 0.239231         | -0.081456        | <b>-0.399780</b> | -0.155440       | -0.701170  |
| PC 2                                                                                                                                                                                                                                                                                                     | 0.114722         | <b>0.260795</b>  | 0.039562         | 0.054166         | 0.155402        | -0.549966  |
| PC 3                                                                                                                                                                                                                                                                                                     | 0.142055         | 0.020900         | 0.138590         | <b>-0.545846</b> | -0.231257       | -0.361661  |
| PC 4                                                                                                                                                                                                                                                                                                     | 0.042257         | <b>0.248925</b>  | -0.193497        | 0.051665         | 0.075011        | 0.621444   |
| PC 5                                                                                                                                                                                                                                                                                                     | 0.052861         | -0.098553        | <b>-0.516860</b> | <b>-0.382095</b> | -0.219623       | 0.160404   |
| PC 6                                                                                                                                                                                                                                                                                                     | 0.007922         | -0.087967        | -0.033603        | -0.143546        | <b>0.636912</b> | -0.299520  |
| PC 7                                                                                                                                                                                                                                                                                                     | -0.027936        | 0.035192         | 0.140299         | -0.222518        | -0.050003       | 0.401124   |
| PC 8                                                                                                                                                                                                                                                                                                     | -0.011745        | 0.011621         | 0.164377         | -0.197301        | 0.227887        | 0.521203   |
| PC 9                                                                                                                                                                                                                                                                                                     | 0.019185         | -0.023245        | 0.118341         | 0.078415         | -0.357877       | -0.042495  |
| Eigenvalue                                                                                                                                                                                                                                                                                               | 21.63428         | 10.51349         | 4.81371          | 2.289589         | 1.214652        | 0.103094   |
| Cumulative %                                                                                                                                                                                                                                                                                             | 53.32737         | 79.24258         | 91.10811         | 96.751827        | 99.745879       | 100.000000 |
| <b>B</b> Discriminant function analysis for <i>Nyctibatrachus athirappillyensis</i> sp. nov., <i>N. deccanensis</i> , <i>N. kempholeyensis</i> , <i>N. minor</i> and <i>N. webilla</i> sp. nov.                                                                                                          |                  |                  |                  |                  |                 |            |
| Variable                                                                                                                                                                                                                                                                                                 | DFA root 1       | DFA root 2       | DFA root 3       | DFA root 4       |                 |            |
| PC 1                                                                                                                                                                                                                                                                                                     | <b>-0.357711</b> | <b>-0.433683</b> | <b>0.470935</b>  | 0.298535         |                 |            |
| PC 2                                                                                                                                                                                                                                                                                                     | 0.193941         | <b>-0.765537</b> | <b>-0.357402</b> | -0.163035        |                 |            |
| PC 3                                                                                                                                                                                                                                                                                                     | -0.123361        | 0.043192         | -0.090157        | 0.200764         |                 |            |
| PC 4                                                                                                                                                                                                                                                                                                     | 0.110317         | -0.142839        | 0.427594         | 0.012992         |                 |            |
| PC 5                                                                                                                                                                                                                                                                                                     | 0.155428         | -0.015700        | -0.006147        | 0.673828         |                 |            |
| PC 6                                                                                                                                                                                                                                                                                                     | -0.018058        | -0.074957        | 0.087713         | -0.545524        |                 |            |
| PC 7                                                                                                                                                                                                                                                                                                     | 0.071579         | -0.053981        | 0.087064         | 0.176711         |                 |            |
| PC 8                                                                                                                                                                                                                                                                                                     | 0.136272         | 0.097187         | 0.201054         | -0.417397        |                 |            |
| PC 9                                                                                                                                                                                                                                                                                                     | 0.096340         | 0.068704         | 0.294064         | 0.156414         |                 |            |
| Eigenvalue                                                                                                                                                                                                                                                                                               | 6.32855          | 1.959712         | 1.527055         | 0.055717         |                 |            |
| Cumulative %                                                                                                                                                                                                                                                                                             | 64.11231         | 83.965475        | 99.435546        | 100.000000       |                 |            |
| <b>C</b> Discriminant function analysis for <i>Nyctibatrachus acanthodermis</i> , <i>N. gavi</i> , <i>N. grandis</i> , <i>N. major</i> , <i>N. radcliffei</i> sp. nov. and <i>N. sylvaticus</i> . <i>Nyctibatrachus indraneili</i> was excluded from DFA due to availability of a single representative. |                  |                  |                  |                  |                 |            |
| Variable                                                                                                                                                                                                                                                                                                 | DFA root 1       | DFA root 2       | DFA root 3       | DFA root 4       | DFA root 5      |            |
| PC 1                                                                                                                                                                                                                                                                                                     | <b>0.176161</b>  | -0.200293        | 0.126533         | -0.118893        | 0.050477        |            |
| PC 2                                                                                                                                                                                                                                                                                                     | <b>0.353200</b>  | <b>0.315082</b>  | 0.103382         | 0.223684         | -0.209783       |            |
| PC 3                                                                                                                                                                                                                                                                                                     | 0.080081         | 0.068302         | <b>-0.503501</b> | <b>-0.319431</b> | 0.024912        |            |
| PC 4                                                                                                                                                                                                                                                                                                     | -0.054796        | <b>0.228662</b>  | 0.130158         | <b>-0.560779</b> | 0.363869        |            |
| PC 5                                                                                                                                                                                                                                                                                                     | -0.011191        | 0.059640         | -0.261307        | <b>0.375977</b>  | 0.131899        |            |
| PC 6                                                                                                                                                                                                                                                                                                     | -0.039757        | 0.180237         | -0.110768        | 0.197928         | -0.512070       |            |
| PC 7                                                                                                                                                                                                                                                                                                     | -0.005875        | 0.245499         | <b>0.354062</b>  | 0.112894         | -0.174500       |            |
| PC 8                                                                                                                                                                                                                                                                                                     | -0.010054        | -0.144680        | 0.030043         | -0.170434        | -0.827268       |            |
| PC 9                                                                                                                                                                                                                                                                                                     | -0.005561        | 0.045541         | 0.042566         | -0.103560        | 0.218363        |            |
| Eigenvalue                                                                                                                                                                                                                                                                                               | 17.92688         | 4.962967         | 2.406914         | 1.141375         | 0.066327        |            |
| Cumulative %                                                                                                                                                                                                                                                                                             | 67.63721         | 86.362237        | 95.443403        | 99.749751        | 100.000000      |            |
