# Supplementary material for: Seven new species of Night Frogs (Anura, Nyctibatrachidae) from the Western Ghats Biodiversity Hotspot of India, with remarkably high diversity of diminutive forms
Source: PubMed Central journal article supplement (PMC5322763; doi:10.7717/peerj.3007), 2017-02-21
Supplement: peerj-05-3007-s007.pdf [file peerj-05-3007-s007.pdf]

Supplemental information: **Tables**

**Seven new species of Night Frogs (Anura, Nyctibatrachidae) from the Western Ghats Biodiversity Hotspot of India, with remarkably high diversity of diminutive forms**

Sonali Garg, Robin Suyesh, Sandeep Sukesan and S D Biju

**Table S5. Classification matrices from the discriminant function analyses.**

| <b>A</b> Observed classification for adult male specimens of <i>Nyctibatrachus anamallaiensis</i> , <i>N. beddomii</i> , <i>N. manalari</i> sp. nov., <i>N. minimus</i> , <i>N. pulivijayani</i> sp. nov., <i>N. robinmoorei</i> sp. nov. and <i>N. sabarimalai</i> sp. nov.                                              |                 |                             |                       |                          |                   |                        |                       |                       |
|---------------------------------------------------------------------------------------------------------------------------------------------------------------------------------------------------------------------------------------------------------------------------------------------------------------------------|-----------------|-----------------------------|-----------------------|--------------------------|-------------------|------------------------|-----------------------|-----------------------|
| Species                                                                                                                                                                                                                                                                                                                   | Percent correct | <i>N. anamallaiensis</i>    | <i>N. beddomii</i>    | <i>N. manalari</i>       | <i>N. minimus</i> | <i>N. pulivijayani</i> | <i>N. robinmoorei</i> | <i>N. sabarimalai</i> |
| <i>N. anamallaiensis</i>                                                                                                                                                                                                                                                                                                  | 100             | 5                           | 0                     | 0                        | 0                 | 0                      | 0                     | 0                     |
| <i>N. beddomii</i>                                                                                                                                                                                                                                                                                                        | 100             | 0                           | 10                    | 0                        | 0                 | 0                      | 0                     | 0                     |
| <i>N. manalari</i>                                                                                                                                                                                                                                                                                                        | 100             | 0                           | 0                     | 5                        | 0                 | 0                      | 0                     | 0                     |
| <i>N. minimus</i>                                                                                                                                                                                                                                                                                                         | 100             | 0                           | 0                     | 0                        | 14                | 0                      | 0                     | 0                     |
| <i>N. pulivijayani</i>                                                                                                                                                                                                                                                                                                    | 100             | 0                           | 0                     | 0                        | 0                 | 5                      | 0                     | 0                     |
| <i>N. robinmoorei</i>                                                                                                                                                                                                                                                                                                     | 100             | 0                           | 0                     | 0                        | 0                 | 0                      | 2                     | 0                     |
| <i>N. sabarimalai</i>                                                                                                                                                                                                                                                                                                     | 100             | 0                           | 0                     | 0                        | 0                 | 0                      | 0                     | 5                     |
| Total                                                                                                                                                                                                                                                                                                                     | 100             | 5                           | 10                    | 5                        | 14                | 5                      | 2                     | 5                     |
| <b>B</b> Observed classification for adult male specimens of <i>Nyctibatrachus athirappillyensis</i> sp. nov., <i>N. deccanensis</i> , <i>N. kempholeyensis</i> , <i>N. minor</i> and <i>N. webilla</i> sp. nov.                                                                                                          |                 |                             |                       |                          |                   |                        |                       |                       |
| Species                                                                                                                                                                                                                                                                                                                   | Percent correct | <i>N. athirappillyensis</i> | <i>N. deccanensis</i> | <i>N. kempholeyensis</i> | <i>N. minor</i>   | <i>N. webilla</i>      |                       |                       |
| <i>N. athirappillyensis</i>                                                                                                                                                                                                                                                                                               | 100             | 5                           | 0                     | 0                        | 0                 | 0                      |                       |                       |
| <i>N. deccanensis</i>                                                                                                                                                                                                                                                                                                     | 100             | 0                           | 15                    | 0                        | 0                 | 0                      |                       |                       |
| <i>N. kempholeyensis</i>                                                                                                                                                                                                                                                                                                  | 90.9            | 0                           | 0                     | 10                       | 1                 | 0                      |                       |                       |
| <i>N. minor</i>                                                                                                                                                                                                                                                                                                           | 33.3            | 0                           | 0                     | 3                        | 2                 | 1                      |                       |                       |
| <i>N. webilla</i>                                                                                                                                                                                                                                                                                                         | 100             | 0                           | 0                     | 0                        | 0                 | 4                      |                       |                       |
| Total                                                                                                                                                                                                                                                                                                                     | 87.8            | 5                           | 15                    | 13                       | 3                 | 5                      |                       |                       |
| <b>C</b> Observed classification for adult male specimens of <i>Nyctibatrachus acanthodermis</i> , <i>N. gavi</i> , <i>N. grandis</i> , <i>N. major</i> , <i>N. radcliffei</i> sp. nov. and <i>N. sylvaticus</i> . <i>Nyctibatrachus indraneili</i> was excluded from DFA due to availability of a single representative. |                 |                             |                       |                          |                   |                        |                       |                       |
| Species                                                                                                                                                                                                                                                                                                                   | Percent correct | <i>N. acanthodermis</i>     | <i>N. gavi</i>        | <i>N. grandis</i>        | <i>N. major</i>   | <i>N. radcliffei</i>   | <i>N. sylvaticus</i>  |                       |
| <i>N. acanthodermis</i>                                                                                                                                                                                                                                                                                                   | 100             | 4                           | 0                     | 0                        | 0                 | 0                      | 0                     |                       |
| <i>N. gavi</i>                                                                                                                                                                                                                                                                                                            | 100             | 0                           | 2                     | 0                        | 0                 | 0                      | 0                     |                       |
| <i>N. grandis</i>                                                                                                                                                                                                                                                                                                         | 100             | 0                           | 0                     | 3                        | 0                 | 0                      | 0                     |                       |
| <i>N. major</i>                                                                                                                                                                                                                                                                                                           | 100             | 0                           | 0                     | 0                        | 7                 | 0                      | 0                     |                       |
| <i>N. radcliffei</i>                                                                                                                                                                                                                                                                                                      | 100             | 0                           | 0                     | 0                        | 0                 | 5                      | 0                     |                       |
| <i>N. sylvaticus</i>                                                                                                                                                                                                                                                                                                      | 100             | 0                           | 0                     | 0                        | 0                 | 0                      | 4                     |                       |
| Total                                                                                                                                                                                                                                                                                                                     | 100             | 4                           | 2                     | 3                        | 7                 | 5                      | 4                     |                       |
