# Supplementary material for: Seven new species of Night Frogs (Anura, Nyctibatrachidae) from the Western Ghats Biodiversity Hotspot of India, with remarkably high diversity of diminutive forms
Source: PubMed Central journal article supplement (PMC5322763; doi:10.7717/peerj.3007), 2017-02-21
Supplement: peerj-05-3007-s008.pdf [file peerj-05-3007-s008.pdf]

Supplemental information: **Tables**

**Seven new species of Night Frogs (Anura, Nyctibatrachidae) from the Western Ghats Biodiversity Hotspot of India, with remarkably high diversity of diminutive forms**

Sonali Garg, Robin Suyesh, Sandeep Sukesan and S D Biju

**Table S6. Morphometric measurements (in mm) of the adult specimens of seven new *Nyctibatrachus* species described in the study.** The range, mean, and standard deviation are given for each parameter. Male (M) and female (F).

|     | <i>N. athirappillyensis</i> |         | <i>N. manalari</i>   | <i>N. pulivijayani</i> | <i>N. radcliffei</i> | <i>N. robinmoorei</i> |         | <i>N. sabarimalai</i> |         | <i>N. webilla</i>    |
|-----|-----------------------------|---------|----------------------|------------------------|----------------------|-----------------------|---------|-----------------------|---------|----------------------|
|     | M (N=5)                     | F (N=1) | M (N=5)              | M (N=5)                | M (N=5)              | M (N=2)               | F (N=1) | M (N=5)               | F (N=1) | M (N=4)              |
| SVL | 20.9–22.8 (21.8±0.7)        | 24.1    | 13.1–15.4 (14.3±0.9) | 13.3–14.9 (14.3±0.6)   | 32.8–38.3 (34.4±2.2) | 12.2–13.4 (12.8±0.8)  | 17.4    | 12.3–13.2 (12.8±0.4)  | 17.1    | 18.7–20.7 (19.6±0.8) |
| HW  | 7.6–7.9 (7.8±0.1)           | 8.3     | 5.0–6.2 (5.7±0.5)    | 5.1–5.7 (5.4±0.3)      | 13.2–14.5 (13.7±0.5) | 4.0–5.2 (4.6±0.8)     | 6.8     | 4.2–4.4 (4.3±0.1)     | 5.6     | 7.2–8.1 (7.6±0.5)    |
| HL  | 7.7–8.2 (7.9±0.2)           | 8.2     | 4.2–5.1 (4.6±0.4)    | 5.0–5.8 (5.4±0.3)      | 12.0–13.6 (12.6±0.6) | 4.1–5.2 (4.7±0.8)     | 5.5     | 4.9–5.3 (5.1±0.2)     | 4.4     | 6.4–6.9 (6.6±0.2)    |
| SL  | 3.3–3.7 (3.5±0.1)           | 4.1     | 1.8–2.4 (2.1±0.2)    | 2.1–2.5 (2.3±0.2)      | 5.3–6.2 (5.7±0.4)    | 2.0–2.1 (2.1±0.1)     | 2.5     | 1.9–2.0 (2.0±0.1)     | 2.4     | 3.0–3.3 (3.1±0.2)    |
| EL  | 2.3–2.7 (2.4±0.2)           | 2.7     | 1.4–1.8 (1.6±0.1)    | 1.5–1.8 (1.6±0.1)      | 3.6–3.9 (3.7±0.2)    | 1.5–1.5 (1.5±0)       | 1.8     | 1.4–1.6 (1.4±0.1)     | 1.9     | 2.2–2.5 (2.4±0.1)    |
| EN  | 1.3–1.4 (1.4±0.1)           | 1.6     | 0.6–0.8 (0.7±0.1)    | 0.7–0.9 (0.8±0.1)      | 1.8–2.6 (2.1±0.3)    | 1.0–1.1 (1.1±0.1)     | 0.8     | 0.6–0.9 (0.8±0.1)     | 0.9     | 1.3–1.5 (1.4±0.1)    |
| NS  | 1.4–1.7 (1.6±0.1)           | 1.9     | 0.9–1.1 (1.0±0.1)    | 1.0–1.3 (1.2±0.1)      | 2.6–3.3 (2.9±0.3)    | 1.2–1.3 (1.3±0.1)     | 1.3     | 0.9–1.2 (1.1±0.2)     | 1.1     | 1.5–1.9 (1.6±0.2)    |
| IUE | 2.5–2.9 (2.7±0.2)           | 3.1     | 1.9–2.3 (2.1±0.2)    | 1.9–2.3 (2.0±0.2)      | 3.4–3.9 (3.7±0.2)    | 1.9–2.0 (2.0±0.1)     | 2.1     | 1.6–2.0 (1.8±0.2)     | 2.2     | 2.6–3.0 (2.8±0.2)    |
| UEW | 1.1–1.4 (1.2±0.1)           | 1.3     | 0.7–1.0 (0.8±0.1)    | 0.7–0.9 (0.8±0.1)      | 1.7–2.3 (2.0±0.2)    | 0.5–0.6 (0.6±0.1)     | 0.7     | 0.6–0.8 (0.7±0.1)     | 0.9     | 0.9–1.2 (1.1±0.1)    |
| IN  | 1.5–1.9 (1.7±0.2)           | 1.9     | 1.5–1.7 (1.6±0.1)    | 1.6–1.9 (1.7±0.1)      | 2.6–3.1 (2.9±0.2)    | 1.5–1.5 (1.5±0.0)     | 1.5     | 1.3–1.6 (1.5±0.1)     | 1.6     | 2.0–2.2 (2.1±0.1)    |
| FAL | 3.6–3.8 (3.7±0.1)           | 4.4     | 2.0–2.5 (2.3±0.2)    | 2.3–2.8 (2.6±0.2)      | 6.5–6.9 (6.6±0.2)    | 1.9–2.0 (2.0±0.1)     | 2.7     | 2.4–2.8 (2.5±0.2)     | 3.2     | 3.3–3.6 (3.4±0.1)    |
| HAL | 5.3–5.8 (5.5±0.2)           | 6.2     | 3.3–3.9 (3.5±0.3)    | 3.0–3.6 (3.3±0.2)      | 9.5–11.2 (10.1±0.7)  | 1.7–1.9 (1.8±0.1)     | 3.6     | 2.5–2.9 (2.7±0.2)     | 3.3     | 4.6–4.9 (4.8±0.1)    |
| TL  | 10.0–10.6 (10.2±0.2)        | 11.6    | 6.1–6.8 (6.5±0.3)    | 6.3–7.1 (6.7±0.4)      | 17.6–19.0 (18.3±0.5) | 6.5–6.8 (6.7±0.2)     | 8.1     | 6.1–6.7 (6.3±0.2)     | 7.3     | 9.0–9.9 (9.3±0.4)    |
| SHL | 10.2–10.6 (10.3±0.2)        | 11.5    | 6.2–6.8 (6.5±0.2)    | 6.5–6.9 (6.7±0.1)      | 16.4–17.6 (16.9±0.5) | 5.1–5.2 (5.2±0.1)     | 7.1     | 6.1–6.6 (6.3±0.2)     | 7.2     | 8.1–9.0 (8.5±0.4)    |
| FOL | 10.0–10.7 (10.4±0.3)        | 11.8    | 7.2–7.5 (7.4±0.2)    | 6.5–6.8 (6.6±0.1)      | 16.7–17.1 (16.9±0.2) | 5.2–5.3 (5.3±0.1)     | 7.2     | 6.1–6.6 (6.3±0.2)     | 6.9     | 9.0–9.8 (9.3±0.4)    |
