# Supplementary material for: Seven new species of Night Frogs (Anura, Nyctibatrachidae) from the Western Ghats Biodiversity Hotspot of India, with remarkably high diversity of diminutive forms
Source: PubMed Central journal article supplement (PMC5322763; doi:10.7717/peerj.3007), 2017-02-21
Supplement: peerj-05-3007-s010.pdf [file peerj-05-3007-s010.pdf]

Supplemental information: **Tables**

**Seven new species of Night Frogs (Anura, Nyctibatrachidae) from the Western Ghats Biodiversity Hotspot of India, with remarkably high diversity of diminutive forms**

Sonali Garg, Robin Suyesh, Sandeep Sukesan and S D Biju

**Table S8. Call properties of seven *Nyctibatrachus* species measured from single calls.**

| Call Parameters          | <i>N. athirappillyensis</i> |        | <i>N. beddomii</i> |        | <i>N. manalari</i> | <i>N. minimus</i> | <i>N. minor</i> | <i>N. sabarimalai</i> | <i>N. webilla</i> |
|--------------------------|-----------------------------|--------|--------------------|--------|--------------------|-------------------|-----------------|-----------------------|-------------------|
|                          | Part 1                      | Part 2 | Part 1             | Part 2 |                    |                   |                 |                       |                   |
| Duration (ms)            | 93.5                        | 595.8  | 22.7               | 80.6   | 51.1               | 139.9             | 261.1           | 37.4                  | 201.5             |
| Rise time (ms)           | 43.6                        | 1.7    | 3.6                | 20.6   | 6.7                | 1.9               | 40.5            | 1.3                   | 52.9              |
| Fall time (ms)           | 7.3                         | 593.5  | 18.2               | 58.5   | 34.7               | 137.9             | 217.7           | 35.9                  | 92.5              |
| Pulses per call          | -                           | 25     | -                  | 9.0    | -                  | 6.0               | 18.0            | -                     | 20.0              |
| Pulse rate (pulses/s)    | -                           | 42.2   | -                  | 110.0  | -                  | 45.6              | 70.8            | -                     | 104.0             |
| Dominant frequency (kHz) | 1.6                         | 3.4    | 2.2                | 2.2    | 3.6                | 4.4               | 4.9             | 4.0                   | 3.4               |
