# Supplementary material for: Seven new species of Night Frogs (Anura, Nyctibatrachidae) from the Western Ghats Biodiversity Hotspot of India, with remarkably high diversity of diminutive forms
Source: PeerJ journal article supplement (doi:10.7717/peerj.3007), 2017-02-21
Supplement: Supplemental_Figure_S1.pdf [file Supplemental_Figure_S1.pdf]

Supplemental information: **Figures**

**Seven new species of Night Frogs (Anura, Nyctibatrachidae) from the Western Ghats Biodiversity Hotspot of India, with remarkably high diversity of diminutive forms**

Sonali Garg, Robin Suyesh, Sandeep Sukesan and S D Biju

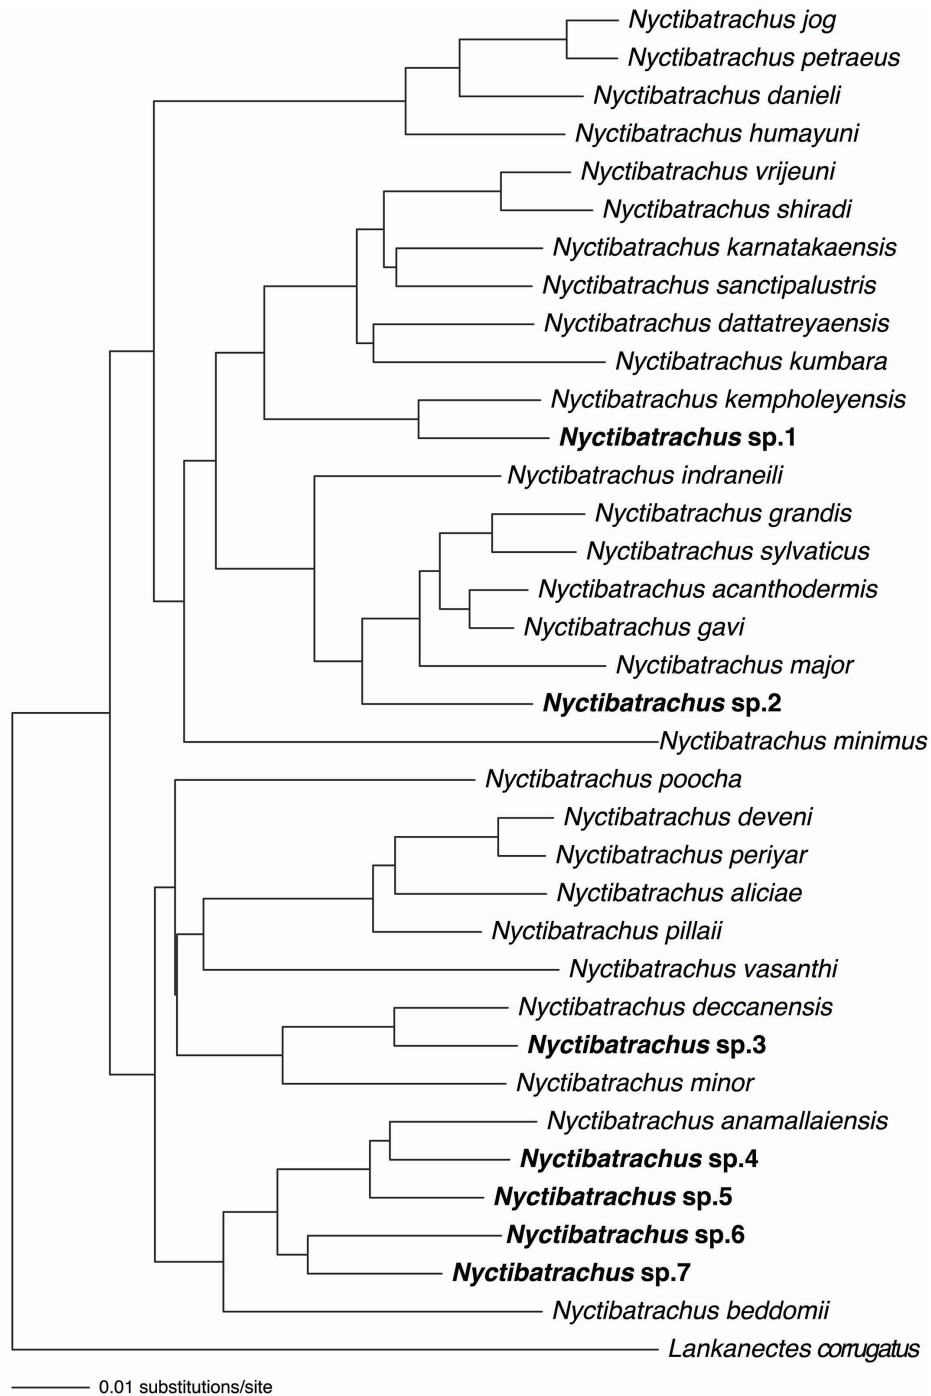

**Figure S1** Neighbor-Joining (NJ) tree based on Kimura-2-parameter model for 16S mitochondrial gene sequences, representing all the 28 previously known *Nyctibatrachus* species, seven newly sampled populations from the Western Ghats and an outgroup taxa.
