# Supplementary material for: Seven new species of Night Frogs (Anura, Nyctibatrachidae) from the Western Ghats Biodiversity Hotspot of India, with remarkably high diversity of diminutive forms
Source: PeerJ journal article supplement (doi:10.7717/peerj.3007), 2017-02-21
Supplement: Supplemental_Table_S3.pdf [file Supplemental_Table_S3.pdf]

Supplemental information: **Tables**

**Seven new species of Night Frogs (Anura, Nyctibatrachidae) from the Western Ghats Biodiversity Hotspot of India, with remarkably high diversity of diminutive forms**

Sonali Garg, Robin Suyesh, Sandeep Sukesan and S D Biju

**Table S3. Factor loadings, eigenvalues and percent variance from Principal component analysis based on nine size-corrected morphometric variables.** Values in bold indicate variables with the highest loadings for principal components of eigenvalue >1.0.

| A. Principal component analysis for adult male specimens of <i>Nyctibatrachus anamallaiensis</i> , <i>N. beddomii</i> , <i>N. manalari</i> sp. nov., <i>N. minimus</i> , <i>N. pulivijayani</i> sp. nov., <i>N. robinmoorei</i> sp. nov. and <i>N. sabarimalai</i> sp. nov. |                  |                  |                  |                  |           |           |           |           |           |
|-----------------------------------------------------------------------------------------------------------------------------------------------------------------------------------------------------------------------------------------------------------------------------|------------------|------------------|------------------|------------------|-----------|-----------|-----------|-----------|-----------|
| Variable                                                                                                                                                                                                                                                                    | PC 1             | PC 2             | PC 3             | PC 4             | PC 5      | PC 6      | PC 7      | PC 8      | PC 9      |
| HW/HL                                                                                                                                                                                                                                                                       | <b>-0.707684</b> | 0.537753         | -0.007675        | 0.177942         | -0.039805 | -0.194227 | -0.320702 | -0.139406 | 0.129190  |
| SL/HL                                                                                                                                                                                                                                                                       | -0.319729        | 0.120961         | <b>-0.750394</b> | -0.364694        | -0.362169 | -0.144721 | 0.179465  | -0.044966 | 0.026635  |
| EL/HL                                                                                                                                                                                                                                                                       | -0.577676        | 0.529307         | 0.152759         | -0.144676        | 0.487535  | -0.008831 | 0.306203  | -0.100968 | -0.011596 |
| HL/SVL                                                                                                                                                                                                                                                                      | <b>0.883365</b>  | -0.286702        | 0.081370         | 0.130864         | -0.024723 | -0.045818 | 0.142086  | -0.247624 | 0.171772  |
| FAL/SVL                                                                                                                                                                                                                                                                     | 0.395666         | 0.073323         | <b>-0.713482</b> | 0.183194         | 0.452784  | 0.271865  | -0.120385 | 0.024394  | 0.038000  |
| HAL/SVL                                                                                                                                                                                                                                                                     | 0.472202         | <b>0.663420</b>  | -0.002604        | 0.455631         | -0.113895 | -0.203441 | 0.165228  | 0.200987  | 0.085062  |
| TL/SVL                                                                                                                                                                                                                                                                      | 0.555910         | 0.173067         | 0.142470         | <b>-0.734451</b> | 0.180370  | -0.162599 | -0.122880 | 0.112010  | 0.121154  |
| SHL/SVL                                                                                                                                                                                                                                                                     | <b>0.805489</b>  | 0.428291         | -0.085784        | -0.024231        | 0.024030  | -0.289056 | -0.094541 | -0.128841 | -0.223918 |
| FOL/SVL                                                                                                                                                                                                                                                                     | 0.289210         | <b>0.673527</b>  | 0.153659         | -0.171779        | -0.295575 | 0.564882  | -0.014282 | -0.054159 | -0.002366 |
| Eigenvalue                                                                                                                                                                                                                                                                  | 3.138104         | 1.778701         | 1.153437         | 1.013395         | 0.709513  | 0.605229  | 0.315041  | 0.166038  | 0.120542  |
| % Total variance                                                                                                                                                                                                                                                            | 34.86782         | 19.76335         | 12.81597         | 11.25994         | 7.88348   | 6.72476   | 3.50045   | 1.84487   | 1.33936   |
| Cum Eigenvalue                                                                                                                                                                                                                                                              | 3.138104         | 4.916805         | 6.070242         | 7.083637         | 7.793150  | 8.398379  | 8.713419  | 8.879458  | 9.000000  |
| Cumulative %                                                                                                                                                                                                                                                                | 34.8678          | 54.6312          | 67.4471          | 78.7071          | 86.5906   | 93.3153   | 96.8158   | 98.6606   | 100.0000  |
| B. Principal component analysis for adult male specimens of <i>Nyctibatrachus athirappillyensis</i> sp. nov., <i>N. deccanensis</i> , <i>N. kempholeyensis</i> , <i>N. minor</i> and <i>N. webilla</i> sp. nov.                                                             |                  |                  |                  |                  |           |           |           |           |           |
| Variable                                                                                                                                                                                                                                                                    | PC 1             | PC 2             | PC 3             | PC 4             | PC 5      | PC 6      | PC 7      | PC 8      | PC 9      |
| HW/HL                                                                                                                                                                                                                                                                       | <b>0.660752</b>  | 0.166926         | 0.388913         | -0.428236        | -0.416979 | -0.033946 | 0.018804  | 0.065872  | -0.145559 |
| SL/HL                                                                                                                                                                                                                                                                       | -0.064299        | <b>0.900245</b>  | -0.055203        | 0.048573         | 0.295055  | 0.041641  | 0.281433  | -0.030294 | -0.105374 |
| EL/HL                                                                                                                                                                                                                                                                       | 0.428554         | <b>0.796440</b>  | -0.033707        | -0.078817        | 0.138277  | -0.105144 | -0.377770 | -0.002179 | 0.042263  |
| HL/SVL                                                                                                                                                                                                                                                                      | <b>-0.876191</b> | -0.303083        | -0.100261        | -0.064639        | 0.187146  | -0.054974 | -0.196447 | -0.026624 | -0.221028 |
| FAL/SVL                                                                                                                                                                                                                                                                     | -0.391120        | -0.111422        | <b>0.754887</b>  | -0.355426        | 0.362979  | 0.026719  | 0.008018  | -0.031211 | 0.070157  |
| HAL/SVL                                                                                                                                                                                                                                                                     | -0.348801        | 0.228576         | 0.487811         | <b>0.715754</b>  | -0.183939 | 0.178351  | -0.086366 | 0.041442  | -0.031746 |
| TL/SVL                                                                                                                                                                                                                                                                      | <b>-0.716760</b> | 0.291517         | -0.164680        | -0.354776        | -0.264338 | 0.401460  | -0.052786 | -0.113768 | 0.038896  |
| SHL/SVL                                                                                                                                                                                                                                                                     | <b>-0.901777</b> | 0.231697         | -0.104569        | -0.164330        | -0.048389 | -0.063764 | 0.025723  | 0.292601  | 0.049917  |
| FOL/SVL                                                                                                                                                                                                                                                                     | <b>-0.797749</b> | 0.257290         | 0.101360         | 0.035869         | -0.305754 | -0.407282 | 0.057895  | -0.146283 | 0.041507  |
| Eigenvalue                                                                                                                                                                                                                                                                  | 3.630085         | 1.834006         | 1.021631         | 0.988924         | 0.646362  | 0.380602  | 0.275183  | 0.128619  | 0.094588  |
| % Total variance                                                                                                                                                                                                                                                            | 40.33427         | 20.37784         | 11.35146         | 10.98805         | 7.18180   | 4.22891   | 3.05759   | 1.42910   | 1.05098   |
| Cum Eigenvalue                                                                                                                                                                                                                                                              | 3.630085         | 5.464091         | 6.485722         | 7.474646         | 8.121008  | 8.501610  | 8.776793  | 8.905412  | 9.000000  |
| Cumulative %                                                                                                                                                                                                                                                                | 40.3343          | 60.7121          | 72.0636          | 83.0516          | 90.2334   | 94.4623   | 97.5199   | 98.9490   | 100.0000  |
| C. Principal component analysis for adult male specimens of <i>Nyctibatrachus acanthodermis</i> , <i>N. gavi</i> , <i>N. grandis</i> , <i>N. indraneili</i> , <i>N. major</i> , <i>N. radcliffei</i> sp. nov. and <i>N. sylvaticus</i> .                                    |                  |                  |                  |                  |           |           |           |           |           |
| Variable                                                                                                                                                                                                                                                                    | PC 1             | PC 2             | PC 3             | PC 4             | PC 5      | PC 6      | PC 7      | PC 8      | PC 9      |
| HW/HL                                                                                                                                                                                                                                                                       | -0.274630        | 0.173544         | <b>0.753449</b>  | 0.537276         | -0.060599 | -0.175778 | -0.002154 | 0.027980  | 0.052460  |
| SL/HL                                                                                                                                                                                                                                                                       | <b>-0.701400</b> | -0.565509        | -0.116102        | 0.281214         | -0.005835 | 0.218936  | -0.189159 | -0.076284 | 0.078165  |
| EL/HL                                                                                                                                                                                                                                                                       | -0.444968        | <b>-0.628317</b> | 0.331681         | -0.458070        | 0.167583  | -0.203717 | 0.010943  | -0.132366 | 0.012465  |
| HL/SVL                                                                                                                                                                                                                                                                      | 0.407343         | <b>0.850528</b>  | -0.173341        | -0.166931        | 0.008501  | -0.094717 | -0.127765 | -0.087264 | 0.140638  |
| FAL/SVL                                                                                                                                                                                                                                                                     | -0.589046        | 0.557333         | 0.311254         | -0.226048        | -0.399836 | 0.071448  | -0.119190 | -0.055983 | -0.110067 |
| HAL/SVL                                                                                                                                                                                                                                                                     | <b>-0.769195</b> | -0.117697        | -0.363589        | -0.076614        | -0.461483 | -0.089548 | 0.161665  | 0.037206  | 0.088956  |
| TL/SVL                                                                                                                                                                                                                                                                      | <b>-0.813944</b> | 0.143684         | -0.418792        | 0.041858         | 0.218335  | -0.223755 | -0.166055 | 0.108293  | -0.051709 |
| SHL/SVL                                                                                                                                                                                                                                                                     | <b>-0.663811</b> | 0.550458         | -0.229279        | 0.288102         | 0.256256  | 0.032851  | 0.176048  | -0.145726 | -0.042473 |
| FOL/SVL                                                                                                                                                                                                                                                                     | <b>-0.695370</b> | 0.366584         | 0.353361         | -0.348302        | 0.276549  | 0.192543  | 0.058253  | 0.118098  | 0.070756  |
| Eigenvalue                                                                                                                                                                                                                                                                  | 3.456633         | 2.250603         | 1.303120         | 0.868477         | 0.594515  | 0.230645  | 0.154532  | 0.083167  | 0.058309  |
| % Total variance                                                                                                                                                                                                                                                            | 38.40703         | 25.00670         | 14.47911         | 9.64974          | 6.60572   | 2.56272   | 1.71702   | 0.92408   | 0.64787   |
| Cum Eigenvalue                                                                                                                                                                                                                                                              | 3.456633         | 5.707236         | 7.010356         | 7.878833         | 8.473347  | 8.703993  | 8.858524  | 8.941691  | 9.000000  |
| Cumulative %                                                                                                                                                                                                                                                                | 38.4070          | 63.4137          | 77.8928          | 87.5426          | 94.1483   | 96.7110   | 98.4280   | 99.3521   | 100.0000  |
