# Supplementary material for: Seven new species of Night Frogs (Anura, Nyctibatrachidae) from the Western Ghats Biodiversity Hotspot of India, with remarkably high diversity of diminutive forms
Source: PeerJ journal article supplement (doi:10.7717/peerj.3007), 2017-02-21
Supplement: Supplemental_Table_S7.pdf [file Supplemental_Table_S7.pdf]

Supplemental information: **Tables**

**Seven new species of Night Frogs (Anura, Nyctibatrachidae) from the Western Ghats Biodiversity Hotspot of India, with remarkably high diversity of diminutive forms**

Sonali Garg, Robin Suyesh, Sandeep Sukesan and S D Biju

**Table S7. Diagnostic characters for the new and morphologically related *Nyctibatrachus* species.** (1) snout to vent size (SVL); (2) dorsal skin texture and dorsolateral folds; (3) inverted 'Y'-shaped ridge over the snout; (4) foot webbing; (5) third finger disc morphology; (6) fourth toe disc morphology; (7) relative size of finger disc compared to finger width; (8) relative size of toe disc compared to toe width; (9) HW/HL ratio; (10) TL/SHL ratio. All comparative measures are for adult male specimens.

|                             | (1)                     | (2)                                                                                                | (3)              | (4)     | (5)                                                  | (6)                                                  | (7)                                                                 | (8)                                                               | (9)                                   | (10)                                      |
|-----------------------------|-------------------------|----------------------------------------------------------------------------------------------------|------------------|---------|------------------------------------------------------|------------------------------------------------------|---------------------------------------------------------------------|-------------------------------------------------------------------|---------------------------------------|-------------------------------------------|
| <i>N. anamallaiensis</i>    | Miniature, 13.1–15.7 mm | Prominently shagreened with glandular projections, presence of weakly developed dorsolateral folds | Weakly developed | Absent  | With dorso-terminal groove, cover bifurcate distally | With dorso-terminal groove, cover bifurcate distally | Slightly wide, FD <sub>III</sub> 0.3, FW <sub>III</sub> 0.2         | Slightly wide, TD <sub>IV</sub> 0.4, TW <sub>IV</sub> 0.2–0.3     | Head wider, 115.7–126.1%              | Nearly equal, 98.4–101.6%                 |
| <i>N. beddomii</i>          | Miniature, 13.3–18 mm   | Smooth to shagreened with scattered spinular projections                                           | Weakly developed | Absent  | With dorso-terminal groove, cover bifurcate distally | With dorso-terminal groove, cover bifurcate distally | Slightly wide, FD <sub>III</sub> 0.4–0.6, FW <sub>III</sub> 0.2–0.3 | Slightly wide, TD <sub>IV</sub> 0.5–0.6, TW <sub>IV</sub> 0.2–0.4 | Head wider, 106.6–129.3%              | Nearly equal, 95.9–101.6%                 |
| <i>N. manalari</i>          | Miniature, 13.1–15.4 mm | Shagreened with scattered glandular projections, presence of weakly developed dorsolateral folds   | Weakly developed | Absent  | With dorso-terminal groove, cover bifurcate distally | With dorso-terminal groove, cover bifurcate distally | Slightly wide, FD <sub>III</sub> 0.3–0.4, FW <sub>III</sub> 0.2–0.3 | Slightly wide, TD <sub>IV</sub> 0.4–0.6, TW <sub>IV</sub> 0.2–0.3 | Head wider, 115.7–135.6%              | Nearly equal, 98.4–101.5%                 |
| <i>N. minimus</i>           | Miniature, 10–14 mm     | Shagreened with faint and interrupted glandular projections                                        | Weakly developed | Absent  | With dorso-terminal groove, cover bifurcate distally | With dorso-terminal groove, cover bifurcate distally | Slightly wide, FD <sub>III</sub> 0.3–0.4, FW <sub>III</sub> 0.1–0.3 | Slightly wide, TD <sub>IV</sub> 0.4–0.5, TW <sub>IV</sub> 0.2–0.3 | Head nearly equal or wider, 95.7–108% | Thigh shorter or nearly equal, 82.4–98.5% |
| <i>N. pulivijayani</i>      | Miniature, 13.3–14.9 mm | Shagreened with scattered glandular projections, presence of weakly developed dorsolateral folds   | Indistinct       | Absent  | With dorso-terminal groove, cover bifurcate distally | With dorso-terminal groove, cover bifurcate distally | Slightly wide, FD <sub>III</sub> 0.3–0.4, FW <sub>III</sub> 0.2–0.3 | Slightly wide, TD <sub>IV</sub> 0.4–0.5, TW <sub>IV</sub> 0.2–0.3 | Nearly equal, 98.3–102%               | Nearly equal, 94–104.5%                   |
| <i>N. robinmoorei</i>       | Miniature, 12.2–13.4 mm | Shagreened with scattered glandular projections, presence of weakly developed dorsolateral folds   | Weakly developed | Absent  | With dorso-terminal groove, cover bifurcate distally | With dorso-terminal groove, cover bifurcate distally | Slightly wide, FD <sub>III</sub> 0.4–0.5, FW <sub>III</sub> 0.3–0.4 | Slightly wide, TD <sub>IV</sub> 0.5–0.6, TW <sub>IV</sub> 0.3     | Nearly equal, 97.6–100%               | Thigh longer, 127.5–130.8%                |
| <i>N. sabarimalai</i>       | Miniature, 12.3–13.2 mm | Shagreened with scattered glandular projections, presence of weakly developed dorsolateral folds   | Weakly developed | Absent  | With dorso-terminal groove, cover bifurcate distally | With dorso-terminal groove, cover bifurcate distally | Slightly wide, FD <sub>III</sub> 0.3–0.4, FW <sub>III</sub> 0.2–0.3 | Slightly wide, TD <sub>IV</sub> 0.5–0.6, TW <sub>IV</sub> 0.3–0.4 | Head longer, 82.4–89.8%               | Nearly equal, 98.4–101.6%                 |
| <i>N. athirappillyensis</i> | Small-sized,            | Weakly wrinkled with                                                                               | Well             | Medium, | With dorso-                                          | With dorso-                                          | Slightly wide,                                                      | Moderately wide,                                                  | Nearly equal,                         | Nearly equal,                             |

|                          |                                        |                                                                                                     |                |                                                                       |                                                      |                                                       |                                                                        |                                                                      |                                    |                                           |
|--------------------------|----------------------------------------|-----------------------------------------------------------------------------------------------------|----------------|-----------------------------------------------------------------------|------------------------------------------------------|-------------------------------------------------------|------------------------------------------------------------------------|----------------------------------------------------------------------|------------------------------------|-------------------------------------------|
|                          | 20.9–22.8 mm                           | spinular projections                                                                                | developed      | 2 <sup>+</sup> IV2 <sup>+</sup>                                       | terminal groove, cover rounded distally              | terminal groove, cover notched distally               | FD <sub>III</sub> 0.5–0.7, FW <sub>III</sub> 0.3–0.4                   | TD <sub>IV</sub> 0.7–0.8, TW <sub>IV</sub> 0.3–0.5                   | 96.3–100%                          | 98–100%,                                  |
| <i>N. deccanensis</i>    | Miniature to small-sized, 16.1–20.8 mm | Weakly wrinkled with glandular ridges                                                               | Well developed | Medium, 3IV3                                                          | Without dorso-terminal groove                        | With dorso-terminal groove, cover bifurcate distally  | Slightly wide, FD <sub>III</sub> 0.4–0.5, FW <sub>III</sub> 0.2–0.4    | Slightly wide, TD <sub>IV</sub> 0.4–0.9, TW <sub>IV</sub> 0.2–0.6    | Head wider, 101.3–125.8%           | Thigh nearly equal or longer 92.9–115.8%  |
| <i>N. kempholeyensis</i> | Miniature to small-sized, 15.5–21.6 mm | Weakly wrinkled with scattered granular projections and glandular ridges                            | Well developed | Medium, 2 <sup>1</sup> / <sub>2</sub> IV2 <sup>1</sup> / <sub>2</sub> | With dorso-terminal groove, cover rounded distally   | With dorso-terminal groove, cover rounded distally    | Slightly wide, FD <sub>III</sub> 0.4–0.7, FW <sub>III</sub> 0.2–0.4    | Moderately wide, TD <sub>IV</sub> 0.7–1.0, TW <sub>IV</sub> 0.3–0.5  | Nearly equal, 98.9–106%            | Thigh nearly equal or longer, 92.9–104.3% |
| <i>N. minor</i>          | Miniature to small-sized, 15.4–17.9 mm | Weakly wrinkled with dorsolateral glandular ridges separated by an 'X' pattern on the anterior half | Well developed | Basal, 4 <sup>-</sup> IV4 <sup>-</sup>                                | With dorso-terminal groove, cover bifurcate distally | With dorso-terminal groove, cover bifurcate distally  | Slightly wide, FD <sub>III</sub> 0.4–0.5, FW <sub>III</sub> 0.2–0.3    | Slightly wide, TD <sub>IV</sub> 0.4–0.6, TW <sub>IV</sub> 0.2–0.3    | Nearly equal or wider, 95.8–116.9% | Thigh nearly equal or longer 94.8–108.2%  |
| <i>N. webilla</i>        | Small-sized, 18.7–20.7 mm              | Shagreened to granular with scattered glandular ridges                                              | Well developed | Basal, 4IV4 <sup>-</sup>                                              | Without dorso-terminal groove                        | With dorso-terminal groove, cover bifurcate distally  | Slightly wide, FD <sub>III</sub> 0.3–0.4, FW <sub>III</sub> 0.2–0.3    | Moderately wide, TD <sub>IV</sub> 0.6–0.7, TW <sub>IV</sub> 0.3–0.4  | Head wider, 110.8–117.4%           | Thigh longer, 106.9–111.1%                |
| <i>N. acanthoderms</i>   | Large-sized, 52.9–66.2 mm              | Prominently wrinkled with sharp spinular projections                                                | Well developed | Large, 1 <sup>1</sup> / <sub>2</sub> IV1 <sup>1</sup> / <sub>2</sub>  | Without dorso-terminal groove                        | With dorso-terminal groove, cover rounded distally    | Prominently wide, FD <sub>III</sub> 1.4–1.6, FW <sub>III</sub> 0.5–0.8 | Prominently wide, TD <sub>IV</sub> 1.9–2.6, TW <sub>IV</sub> 0.8     | Head wider, 109.7–112.6%           | Nearly equal, 99.3–100.3%,                |
| <i>N. gavi</i>           | Large-sized, 49.5–57.5 mm              | Wrinkled with scattered spinular projections                                                        | Well developed | Large, 2IV2                                                           | Without dorso-terminal groove                        | With dorso-terminal groove, cover rounded distally    | Prominently wide, FD <sub>III</sub> 1.2–1.8, FW <sub>III</sub> 0.6–0.8 | Prominently wide, TD <sub>IV</sub> 1.2–1.4, TW <sub>IV</sub> 0.4–0.5 | Head wider, 105.1–107.8%           | Thigh longer, 102.6–112.1%                |
| <i>N. grandis</i>        | Large-sized, 62.2–76.9 mm              | Wrinkled with scattered glandular projections                                                       | Well developed | Large, 1 <sup>3</sup> / <sub>4</sub> IV1 <sup>3</sup> / <sub>4</sub>  | Without dorso-terminal groove                        | With dorso-terminal groove, cover rounded distally    | Prominently wide, FD <sub>III</sub> 1.6–1.9, FW <sub>III</sub> 0.5–0.8 | Prominently wide, TD <sub>IV</sub> 2.2–2.8, TW <sub>IV</sub> 0.5–0.6 | Head wider, 106.8–108.3%           | Thigh longer, 104.3–113.2%                |
| <i>N. indraneili</i>     | Large-sized, 42.5 mm                   | Weakly wrinkled without glandular projections                                                       | Well developed | Large, 2 <sup>-</sup> IV2 <sup>-</sup>                                | Without dorso-terminal groove                        | Without dorso-terminal groove                         | Moderately wide, FD <sub>III</sub> 1.1, FW <sub>III</sub> 0.7          | Prominently wide, TD <sub>IV</sub> 1.2, TW <sub>IV</sub> 0.6         | Head wider, 104.2%                 | Thigh longer, 110.5%                      |
| <i>N. major</i>          | Medium-sized, 31.5–48.8 mm             | Wrinkled with a few glandular warts                                                                 | Well developed | Large, 2IV2                                                           | Without dorso-terminal groove                        | With dorso-terminal groove, cover rounded distally    | Prominently wide, FD <sub>III</sub> 0.8–1.0, FW <sub>III</sub> 0.4–0.7 | Prominently wide, TD <sub>IV</sub> 0.9–1.4, TW <sub>IV</sub> 0.4–0.7 | Head wider, 110.5–117.8%           | Nearly equal, 99.5–101.3%,                |
| <i>N. radcliffei</i>     | Medium-sized, 32.8–38.3 mm             | Weakly wrinkled without prominent spinular projections                                              | Well developed | Large, 1 <sup>+</sup> IV1                                             | Without dorso-terminal groove                        | With dorso-terminal groove and cover rounded distally | Prominently wide, FD <sub>III</sub> 1.0–1.2, FW <sub>III</sub> 0.4–0.6 | Prominently wide, TD <sub>IV</sub> 1.5–1.6, TW <sub>IV</sub> 0.5–0.6 | Head wider, 106.6–113.3%           | Thigh longer, 107.1–110.2%                |
| <i>N. sylvaticus</i>     | Medium-sized, 28.6–36.2 mm             | Wrinkled with scattered granular projections                                                        | Well developed | Large, 2IV2                                                           | With dorso-terminal groove, cover rounded distally   | With dorso-terminal groove, cover rounded distally    | Moderately wide, FD <sub>III</sub> 0.6–0.9, FW <sub>III</sub> 0.4–0.5  | Prominently wide, TD <sub>IV</sub> 0.9–1.1, TW <sub>IV</sub> 0.4–0.5 | Head wider, 109.3–116.7%           | Thigh longer, 107.8–115.3%                |
